# Supplementary material for: An excellent cyan-emitting orthosilicate phosphor for NUV-pumped white LED application
Source: Royal Society of Chemistry journal article supplement (doi:10.1039/c7tc04168c), 2017-01-01
Supplement: c7tc04168c1.pdf [file c7tc04168c1.pdf]

# **An excellent cyan-emitting orthosilicate phosphor for NUV-pumped white LED application**

Yongfu Liu,<sup>1</sup> \* Jack Silver,<sup>2</sup> \* Rong-Jun Xie,<sup>3</sup> Jiahua Zhang,<sup>4</sup> Huawei Xu,<sup>5</sup> Hezhu Shao,<sup>1</sup> Jun Jiang,<sup>1</sup> and Haochuan Jiang<sup>1</sup>

*1 Ningbo Institute of Materials Technology and Engineering, Chinese Academy of Sciences, No. 1219 Western Zhongguan Road, Ningbo 315201, China;*

*2 Centre for Phosphor and Display Materials, Wolfson Centre for Materials Processing, Brunel University London, Kingston Lane Uxbridge Middlesex, London UB8 3PH, United Kingdom;*

*3 Sialon Group, National Institute for Materials Science (NIMS), Namiki 1-1 Tsukuba, Ibaraki 305-0044, Japan;*

*4 State Key Laboratory of Luminescence and Applications, Changchun Institute of Optics, Fine Mechanics and Physics, Chinese Academy of Sciences, No. 3888 Eastern South Lake Road, Changchun 130033, China;*

*5 The Fifth Research Institute of MIIT, Quality Inspection and Testing Center, No. 110 Dongguan Zhuang Road, Guangzhou 510610, China.*

\*Corresponding author

Email: [liuyongfu@nimte.ac.cn](mailto:liuyongfu@nimte.ac.cn)

[jack.silver@brunel.ac.uk](mailto:jack.silver@brunel.ac.uk)

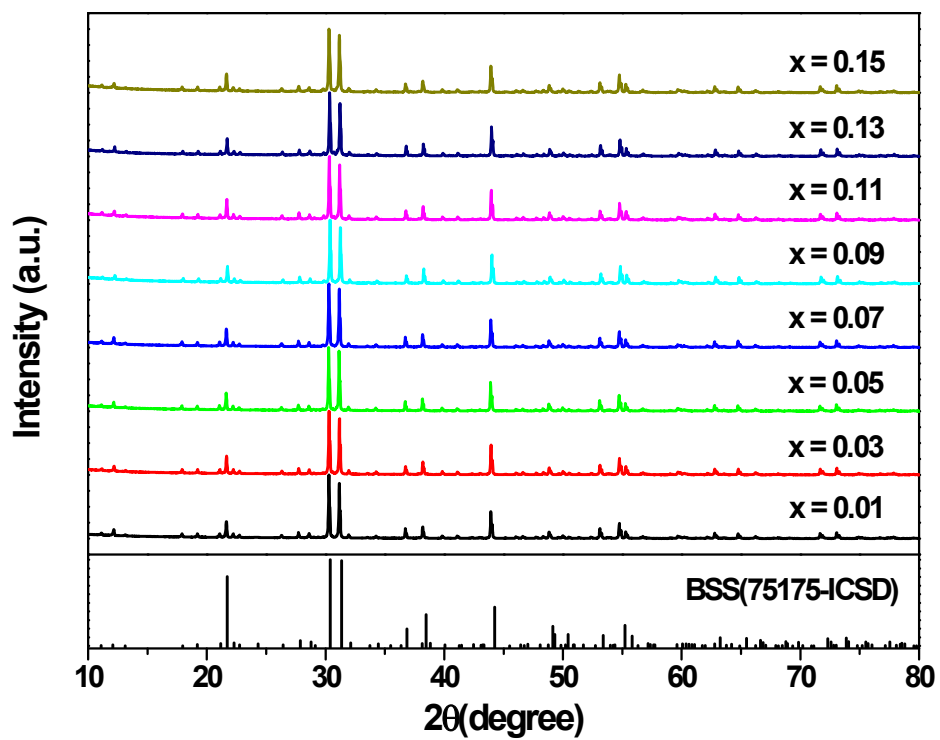

Figure S1 XRD patterns for BLS: $x\text{Ce}^{3+}$  ( $x = 0.01-0.15$ ).

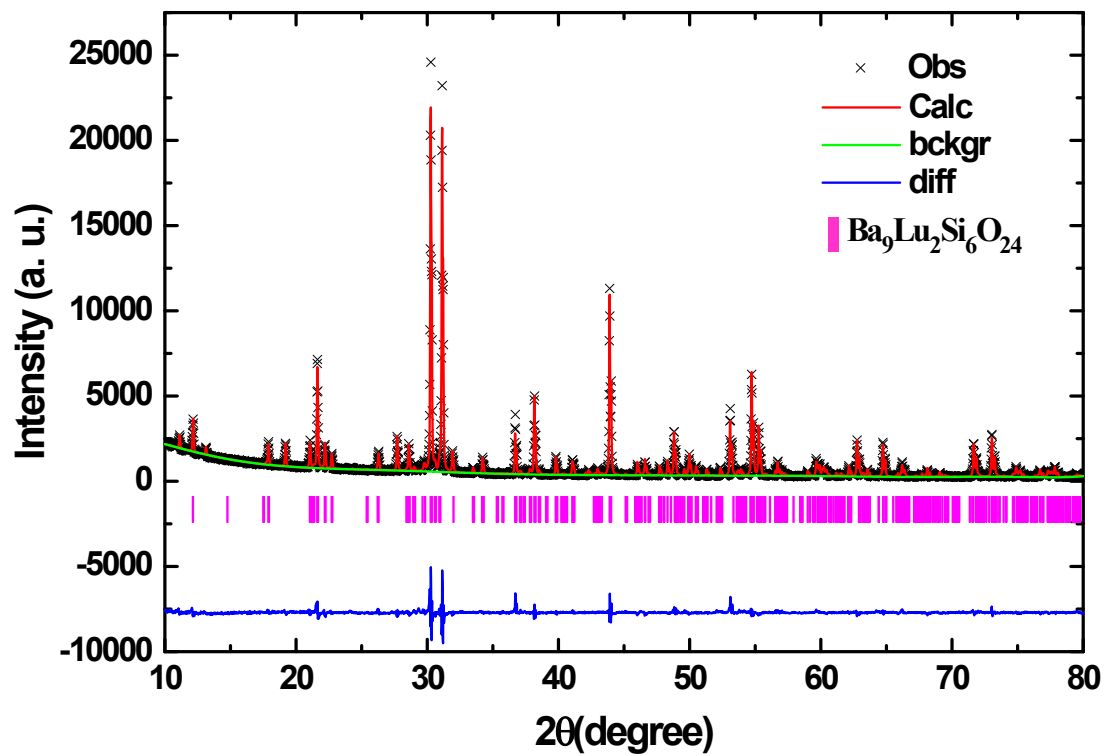

**Figure S2** Rietveld refinement of BLS:5%Ce<sup>3+</sup>. Observed, calculated, background, difference and *hkl* of the XRD pattern are plotted in the same range. The pattern contains two phases: Ba<sub>9</sub>Lu<sub>2</sub>Si<sub>6</sub>O<sub>24</sub> (magenta) and Ba<sub>2</sub>SiO<sub>4</sub> (6246-ICSD, cyan).

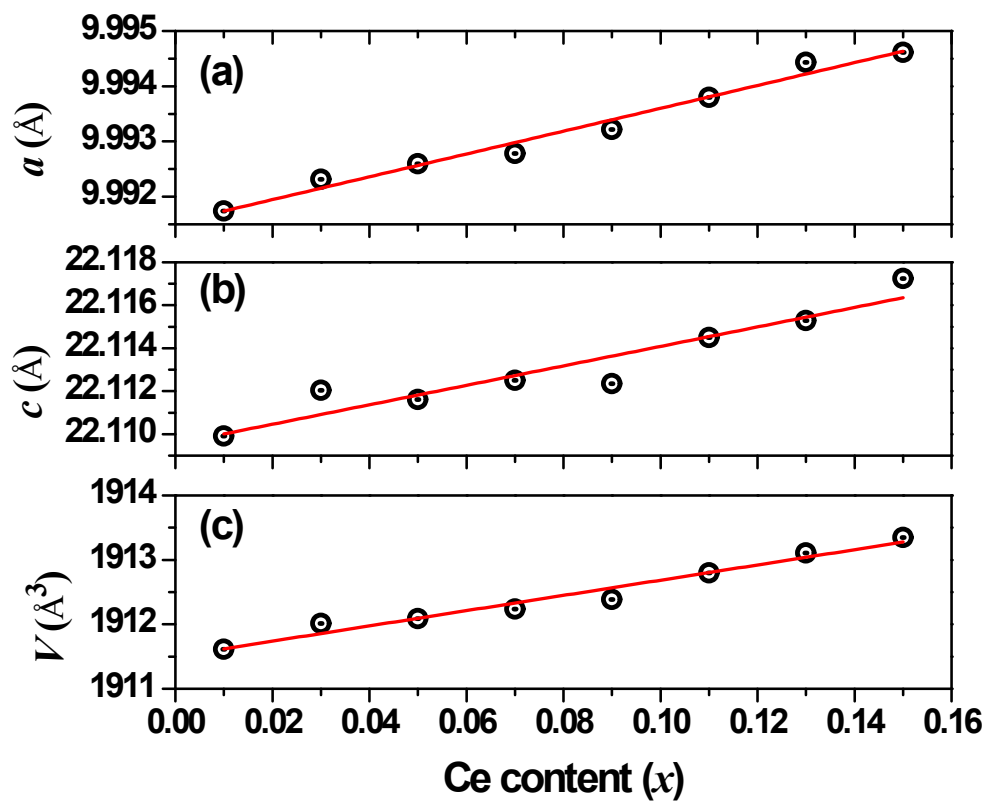

**Figure S3** Refined lattice parameters  $a$  and  $c$  and unit cell volume  $V$  for BLS: $x\text{Ce}^{3+}$  ( $x = 0.01-0.15$ ).

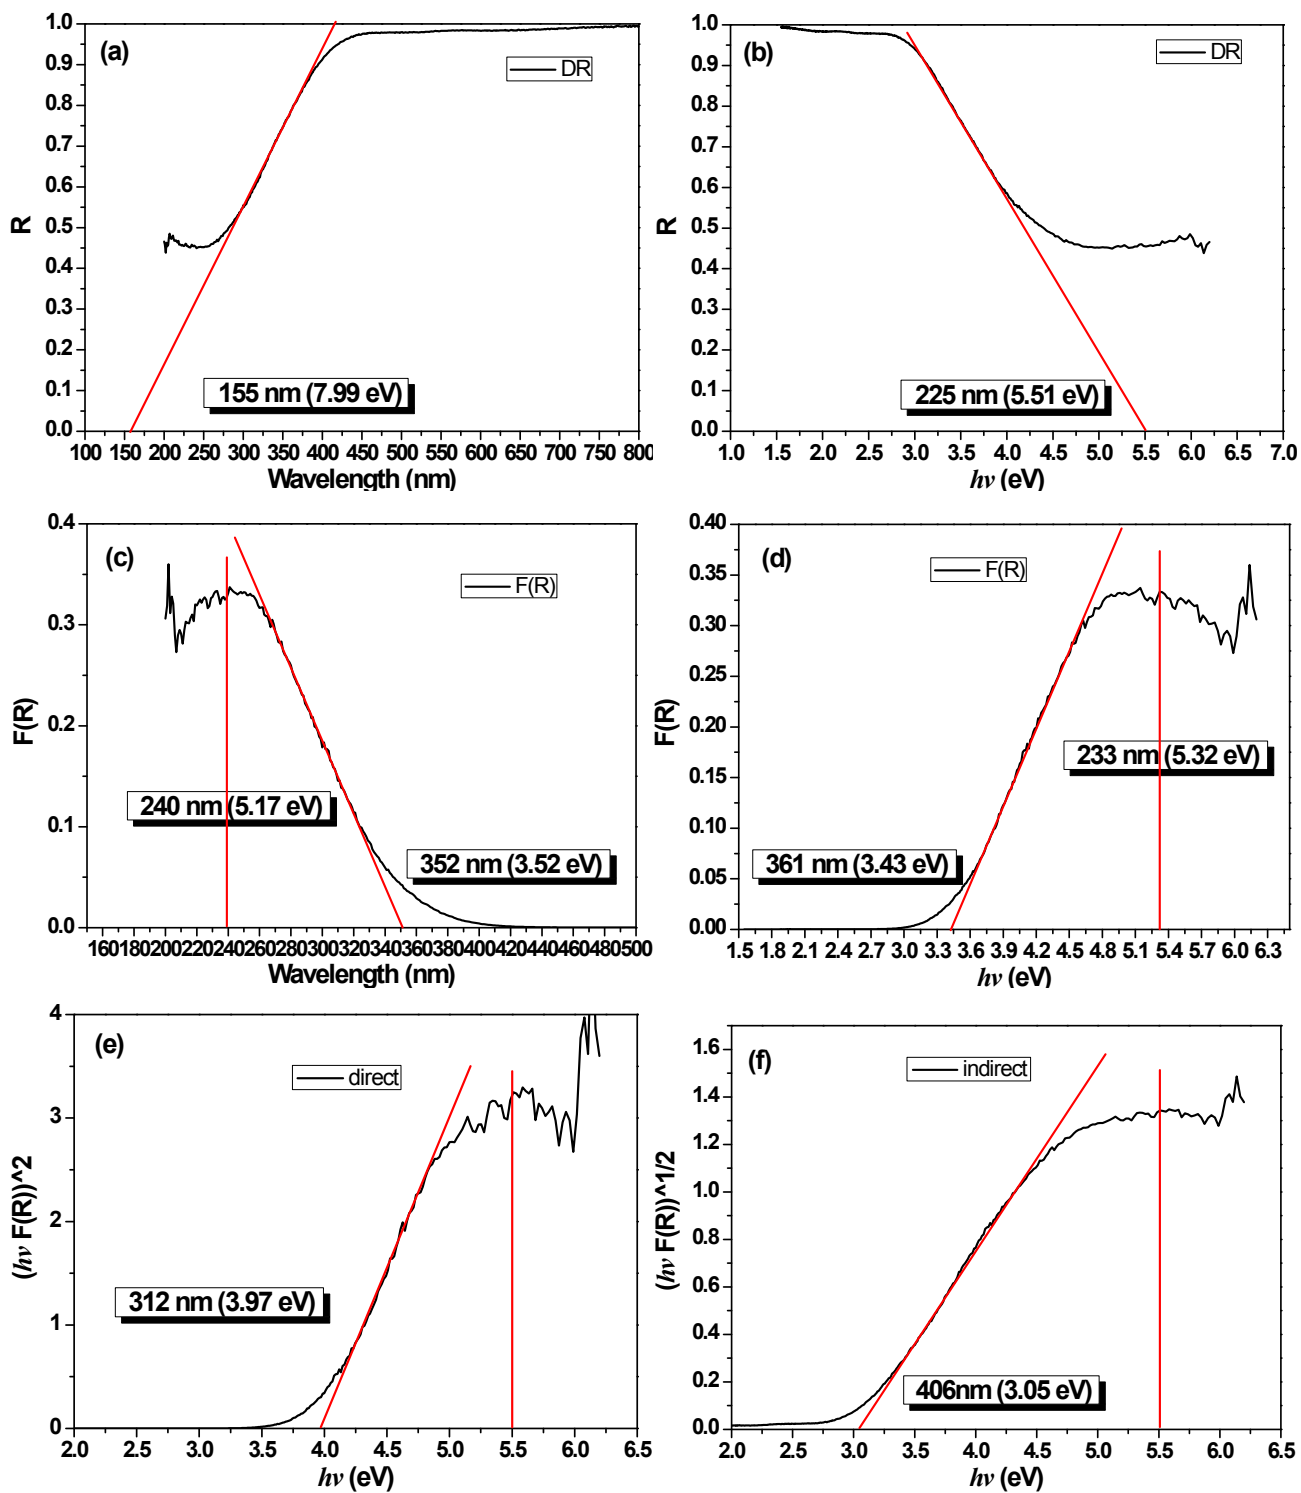

**Figure S4** Optical band gap of the BLS host determined by extrapolating the DR curve (M-1) against wavelength (a) and against energy (b), the F(R) curve (M-2) against wavelength (c) and against energy (d),  $(h\nu F(R))^2$  for a direct band gap (e) and  $(h\nu F(R))^{1/2}$  for an indirect band gap (M-3).

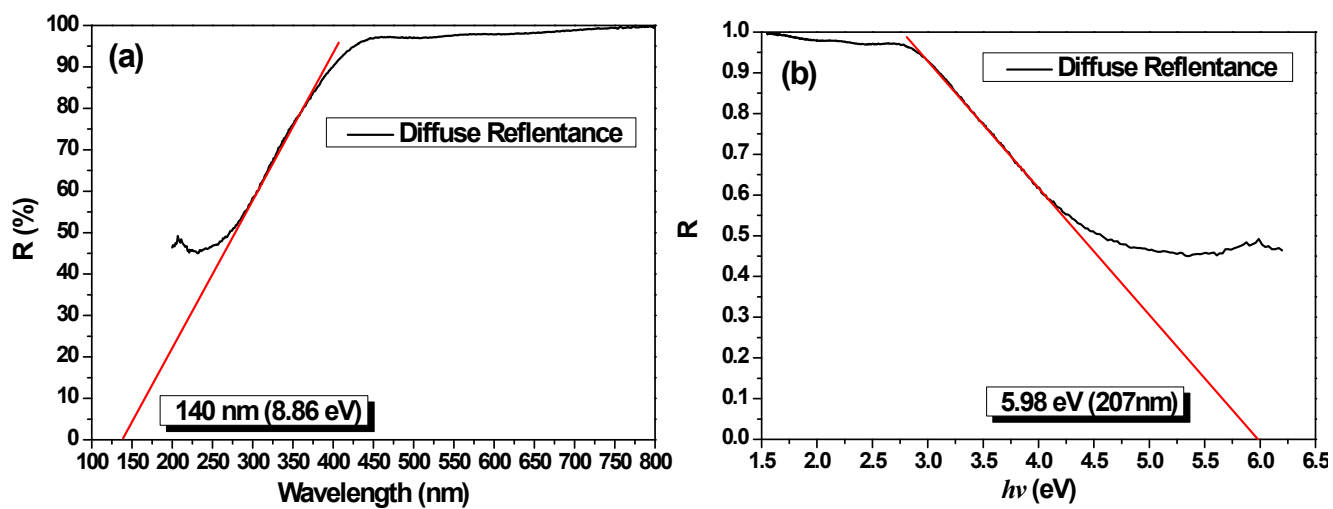

**Figure S5** Optical band gap of the BYS host determined by extrapolating the R curve (M-1) against wavelength (a) and against energy (b).

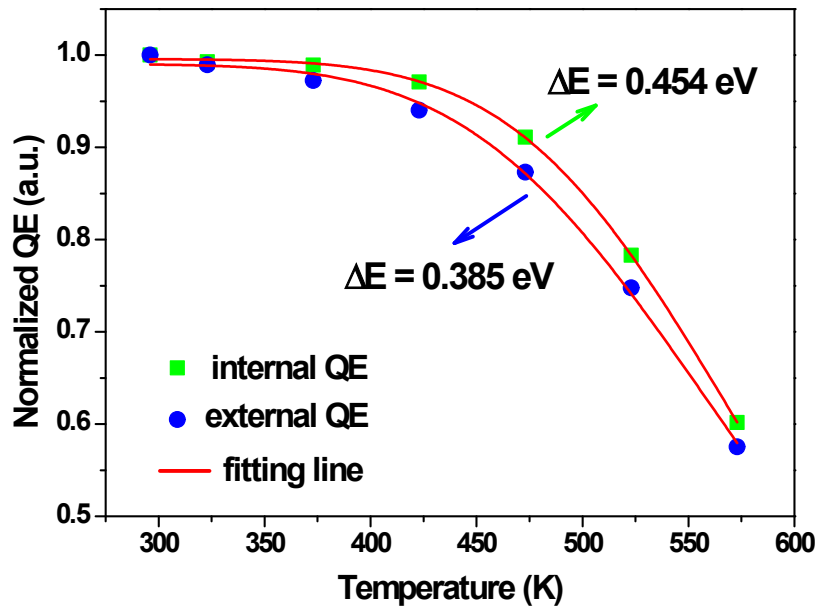

**Figure S6** Temperature-dependent of normalized internal and external QEs for BLS:11%Ce<sup>3+</sup> and fitting results by the Arrhenius equation.

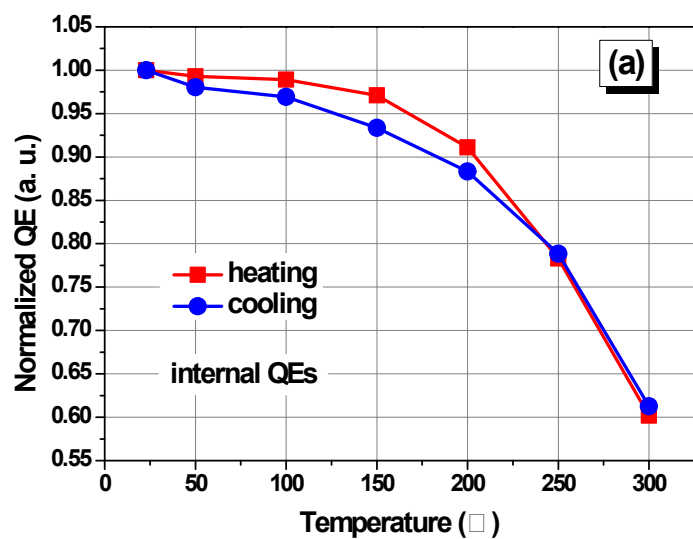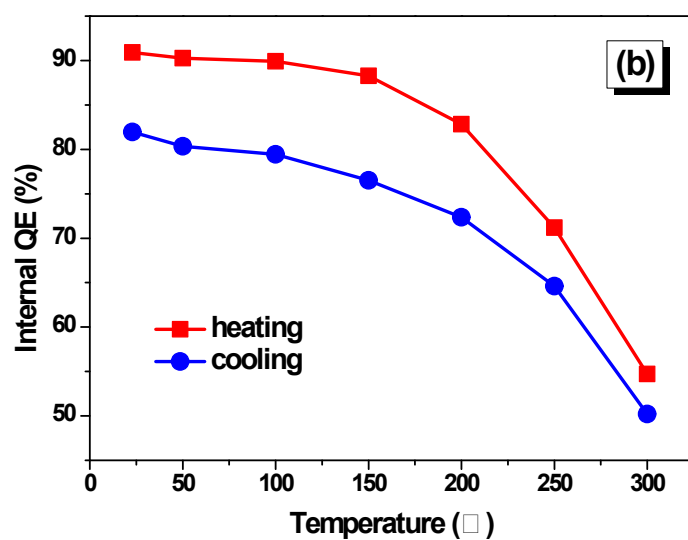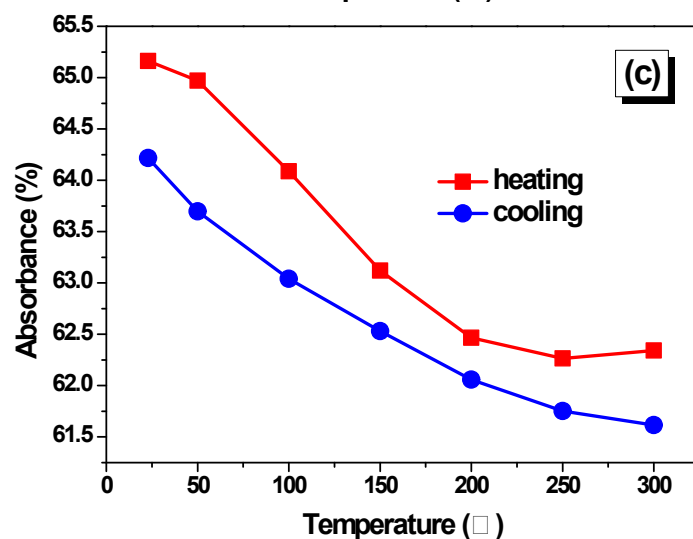

**Figure S7** Temperature dependence of normalized internal QEs (a), internal QEs (b) and absorbance (c) for BLS:11%Ce<sup>3+</sup>.



**Table S1** Rietveld refinement and Crystal data for Ba<sub>9</sub>Lu<sub>2-x</sub>Ce<sub>x</sub>Si<sub>6</sub>O<sub>24</sub> ( $x = 0.01-0.15$ ).

| $x$        | $a$      | $c$       | $V$      | $R_{WP}$ | $R_P$ | $\chi^2$ |
|------------|----------|-----------|----------|----------|-------|----------|
| $x = 0.01$ | 9.991742 | 22.109903 | 1911.613 | 7.87%    | 5.89% | 5.104    |
| $x = 0.03$ | 9.992314 | 22.112038 | 1912.016 | 10.4%    | 7.55% | 8.682    |
| $x = 0.05$ | 9.992594 | 22.111609 | 1912.086 | 7.74%    | 6.07% | 4.416    |
| $x = 0.07$ | 9.992785 | 22.112505 | 1912.236 | 9.05%    | 6.68% | 6.658    |
| $x = 0.09$ | 9.993217 | 22.112343 | 1912.388 | 9.23%    | 7.25% | 6.268    |
| $x = 0.11$ | 9.993797 | 22.114502 | 1912.797 | 10.9%    | 8.58% | 8.946    |
| $x = 0.13$ | 9.994432 | 22.115292 | 1913.108 | 10.8%    | 8.71% | 9.958    |
| $x = 0.15$ | 9.994613 | 22.117237 | 1913.346 | 11.4%    | 8.90% | 8.961    |

**Table S2** Atomic Parameters,  $x$ ,  $y$ ,  $z$ , occupancy, Uiso and Wyckoff position for Ba<sub>9</sub>Lu<sub>2</sub>Si<sub>6</sub>O<sub>24</sub>:5%Ce<sup>3+</sup>.

| atom | $x$         | $y$        | $z$        | Occupancy | Uiso*100 | Wyckoff position |
|------|-------------|------------|------------|-----------|----------|------------------|
| Ba1  | 0.00000(0)  | 0.00000(0) | 0.00000(0) | 1.0000    | 0.82(3)  | 3a               |
| Ba2  | 0.33330(0)  | 0.66670(0) | 0.00420(1) | 1.0000    | 0.57(7)  | 6c               |
| Ba3  | 0.03203(0)  | 0.67011(8) | 0.10848(5) | 1.0000    | 0.77(1)  | 18f              |
| Lu   | 0.00000(0)  | 0.00000(0) | 0.16383(5) | 1.0000    | 2.53(1)  | 6c               |
| Si   | 0.33854(5)  | 0.01357(8) | 0.07356(3) | 1.0000    | 2.86(4)  | 18f              |
| O1   | 0.35161(6)  | 0.05826(1) | 0.00330(7) | 1.0000    | 6.72(6)  | 18f              |
| O2   | 0.49420(1)  | 0.14148(0) | 0.10621(8) | 1.0000    | 2.04(4)  | 18f              |
| O3   | -0.03290(3) | 0.16891(2) | 0.10333(8) | 1.0000    | 0.40(0)  | 18f              |
| O4   | 0.16581(9)  | 0.47469(8) | 0.09243(3) | 1.0000    | 0.69(2)  | 18f              |

**Table S3** Selected Bond Distances for Ba<sub>9</sub>Lu<sub>2</sub>Si<sub>6</sub>O<sub>24</sub>:5%Ce<sup>3+</sup>.

| Bond        | Distance (Å) | Bond   | Distance (Å) |
|-------------|--------------|--------|--------------|
| Ba1-O1 (6×) | 3.298(4)     | Ba3-O1 | 2.548(7)     |
| Ba1-O3 (6×) | 2.861(1)     | Ba3-O2 | 2.981(6)     |
| Ba2-O1 (3×) | 2.893(4)     | Ba3-O2 | 3.065(7)     |
| Ba2-O2 (3×) | 3.115(3)     | Ba3-O2 | 3.086(8)     |
| Ba2-O4 (3×) | 2.776(6)     | Ba3-O3 | 2.929(7)     |
| Lu-O2       | 2.163(0)     | Ba3-O3 | 3.038(3)     |
| Lu-O3       | 2.225(7)     | Ba3-O3 | 3.176(6)     |
| Si-O1       | 1.589(1)     | Ba3-O4 | 2.703(2)     |
| Si-O2       | 1.671(3)     | Ba3-O4 | 2.718(5)     |
| Si-O3       | 1.653(6)     | Ba3-O4 | 3.113(1)     |
| Si-O4       | 1.629(1)     |        |              |
